# Supplementary material for: Effective mHealth Interventions to Improve Tuberculosis Treatment Adherence in Asia: A Systematic Review and Meta-Analysis
Source: Research Square preprint supplement (doi:10.21203/rs.3.rs-8383251/v1), 2025-12-22
Supplement: Supplementary file 1 [file 26faeab9b1a4f1b0193fc447.docx]

| **Study ID** | **Author & Publication year** | **Country** | **Intervention vs Control** | **Outcome Measured** | **Income level** | **Control****Group****Size** | **Intervention****Group****Size** | **Treatment****duration** | **Technology type** | **Direction** | **Frequency** | **Technology complexity** | **Education aspect (Y/N)** |
| --- | --- | --- | --- | --- | --- | --- | --- | --- | --- | --- | --- | --- | --- |
| 1 | Gupta et al. , 2010 | India | SMS + DOTS vs DOTS | Treatment success | Lower - middle Income | 156 | 155 | 6 months | SMS + Voice call | Unidirectional | Daily SMS | Low | Y |
| 2 | Fang et al., 2017 | China | SMS vs DOTS | Treatment success | Upper middle Income | 190 | 160 | 6-8 months | SMS | Unidirectional | Daily SMS | Low | Y |
| 3 | Mohammed et al., 2016 | Pakistan | SMS vs Standard care without SMS | Treatment success | Lower - middle Income | 1097 | 1110 | 6-8 months | SMS | Bidirectional | Daily SMS | Low | Y |
| 4 | Guo et al., 2020 | China | VDOT via app vs. DOT | Treatment adherence (cured + completed) | Upper middle Income | 202 | 203 | 6-8 months | VDOT | Bidirectional | Daily | High | N |
| 5 | Farooqi et al., 2017 | Pakistan | SMS vs DOTS | Default rate of treatment adherence | Lower - middle Income | 74 | 74 | 6 months | SMS | Unidirectional | Daily | Low | Y |
| 6 | Kumwichar et al., 2024 | Thailand | Smartphone-based VDOT vs Community-based DOT | Compliance days | Upper middle Income | 65 | 63 | 60 days + 61 – 63 days = 4 months | VDOT | Bidirectional | Daily | High | N |
| 7 | Liu et al., 2015 | China | Medication Monitor + SMS vs DOTS | Poor adherence (<20% doses missed) | Upper middle Income | 1104 | 3069 (1008 + 997 + 1064) | 6 months | Medication monitor | Bidirectional | Daily | High | Y |
| 8 | Jerene et al., 2025 | Philippines | Smart pillbox/ medication labels for SMS + differentiated care vs standard care | Composite of poor outcome (failure, loss to follow-up, death) | Lower - middle Income | 3010 | 3454 | 6 months | Pillbox/SMS + differentiated care | Unidirectional | Monthly | Medium | Y |
| 9 | Wei et al., 2024 | China | EMM + smartphone app + trained supporter vs standard care | Poor adherence (≥20% missed doses | Upper middle Income | 134 | 142 | 6 months | Electronic Medication Monitor (EMM) providing voice reminders + Smartphone app | Bidirectional | Daily | High | Y |
| 10 | Liu et al., 2023 | China | Smart pillbox + monthly adherence reviews vs silent pillbox (control) | Composite outcome (death, loss to follow-up, failure) - Non-adherence | Upper middle Income | 1388 | 1298 | 6 months | Smart pillbox + monthly reviews | Bidirectional | Monthly | Medium | N |
