# Supplementary material for: Effective mHealth Interventions to Improve Tuberculosis Treatment Adherence in Asia: A Systematic Review and Meta-Analysis
Source: Research Square preprint supplement (doi:10.21203/rs.3.rs-8383251/v1), 2025-12-22
Supplement: Supplementary file 2 [file 36a86c239ed556dd779f44c6.docx]

Supplementary material 3: ROB2 explanation

| **Study #** | **Study Name & Author** | **D1: Randomization** | **D2: Deviations** | **D3: Missing Data** | **D4: Measurement** | **D5: Selection** | **Overall RoB** |
| --- | --- | --- | --- | --- | --- | --- | --- |
| 1 | Effect of mHealth Interventions on TB Adherence - Shimla, India (Gupta et al., 2020) | Low | Low | Low | Low | Low | LOW RISK |
| Justification | Computer-generated randomization with age/sex matching | All participants received assigned SMS + DOTS intervention; no deviations | Only 1/312 loss to follow-up; ITT analysis | Standardized WHO definitions; objective clinic records | All pre-specified outcomes reported |  |  |
| 2 | Effect of SMS on TB Management - Anhui, China (Fang et al., 2017) | Low | Low | Low | Low | Low | LOW RISK |
| Justification | Simple randomization with balanced baseline characteristics | SMS intervention received as planned; standard TB treatment both groups | Complete follow-up for full treatment duration | Standardized program definitions; objective measurement | All outcomes comprehensively reported; no selective reporting |  |  |
| 3 | Impact of Daily SMS Medication Reminders - Pakistan (Mohammed et al., 2016) | Low | Low | Some Concerns | Low | Low | SOME CONCERNS |
| Justification | Computer-generated allocation; blinded randomization sequence | ITT analysis; no protocol deviations reported | Only 1,191/expected sputum samples collected (603 intervention vs 588 control); 283 defaults with limited follow-up | Primary outcome from clinic registers (objective); self-reported adherence subject to 17% overreporting | All major outcomes reported; sensitivity analysis conducted |  |  |
| 4 | VDOT vs DOT - Telemedicine Technologies (Guo et al., 2020) | Low | Low | Low | Low | Low | LOW RISK |
| Justification | Computer-generated 1:1 randomization; secure allocation concealment | VDOT via smartphone app and routine DOT both delivered as planned | Complete outcome data for all 405 participants; minimal electronic/blister discrepancies (2-8%) | WHO-defined outcomes; objective treatment records and video documentation | All outcomes reported; good/poor outcomes comprehensively documented |  |  |
| 5 | Mobile SMS Reminders - Anti-TB DOTS Program (Farooqi et al., 2017) | Low | Low | Low | Low | Low | LOW RISK |
| Justification | Systematic random allocation with well-matched baseline characteristics | SMS intervention + DOTS and standard DOTS groups received assigned care; no deviations | Complete follow-up achieved for entire 6-month treatment period | Standard TB program definitions; objective measurement criteria | All standard TB outcomes reported; no selective reporting |  |  |
| 6 | Smartphone-based VDOT vs Community DOT - Thailand (Kumwichar et al., 2024) | Low | Low | Some Concerns | Low | Some Concerns | SOME CONCERNS |
| Justification | Computer-generated cluster randomization with proper allocation | 21/63 (33%) VOT patients refused video due to miscommunication but included in ITT | Differential missing data: 43/126 (34%) VOT vs 65/139 (47%) DOT; asymmetric follow-up rates | VDOT measured by video documentation vs DOT by patient self-reports (asymmetric methods) | Compliance rate calculations added post-hoc per protocol modification |  |  |
| 7 | Electronic Reminders - Cluster RCT (Liu et al., 2015) | Low | Low | Low | Low | Low | LOW RISK |
| Justification | Computer-generated cluster randomization; adequate sequence generation | Electronic monitors + SMS intervention and standard DOTS delivered as planned | Minimal missing outcome data; no differential loss to follow-up | Objective electronic monitor data and program records; standardized criteria | All primary outcomes reported; comprehensive adherence/treatment success documentation |  |  |
| 8 | Digital Adherence Technologies - Pragmatic Trials (Jerene et al., 2025) | Low | Low | Low | Low | Low | LOW RISK |
| Justification | Computer-generated allocation stratified by site across multiple trial sites | Digital technologies (monitors/VDOT) vs standard therapy; both received TB treatment as planned | Large sample with minimal missing outcome data; complete treatment follow-up | Standardized WHO definitions applied uniformly; objective electronic monitoring where applicable | All WHO-standard outcomes reported; no selective reporting |  |  |
| 9 | Electronic Medication Monitors - Tibet (Wei et al., 2024 Lancet) | Low | Low | Low | Low | Low | LOW RISK |
| Justification | Computer-generated permuted-block randomization stratified by county; opaque envelopes | Comprehensive package (monitor + app + supporter) vs deactivated monitor + usual care; both received standard TB treatment | ITT analysis; 2 post-randomization exclusions; 8 deaths managed with imputation; no differential attrition | Electronic monitor data verified by blister counts; WHO-defined treatment outcomes from national database | All pre-specified outcomes reported with adjusted and crude estimates; no selective reporting |  |  |
| 10 | Digital Adherence Technologies - Cluster Trial (Liu et al., 2023 China) | Low | Low | Low | Low | Low | LOW RISK |
| Justification | Computer-generated cluster randomization stratified by clinic; proper sequence generation | Electronic monitor + reminders vs standard DOTS; interventions delivered as intended; no deviations | Complete follow-up; primary outcome (adherence) systematically collected; no differential missing data | Objective electronic monitor data + standardized national TB program definitions; uniform measurement | All WHO-standard outcomes reported; comprehensive adherence/treatment documentation; prospectively registered |  |  |
