# Supplementary material for: Effective mHealth Interventions to Improve Tuberculosis Treatment Adherence in Asia: A Systematic Review and Meta-Analysis
Source: Research Square preprint supplement (doi:10.21203/rs.3.rs-8383251/v1), 2025-12-22
Supplement: Supplementary file 3 [file 9ed6d65bb6de76ab8da02482.docx]

Supplementary material 5: full text screening and reason for exclusion -

| **#** | **Study Author(s) and Title** | **Decision** | **Exclusion Category** |
| --- | --- | --- | --- |
| 1 | Browne SH, et al. Wirelessly observed therapy compared to directly observed therapy to confirm and support tuberculosis treatment adherence: A randomized controlled trial. PLoS Med. 2019 Oct;16(10):e1002891. | Exclude | Different patient population |
| 2 | Gopi R, et al. Usefulness and effectiveness of community pharmacists-led mobile phone communication in identification and referral of presumptive tuberculosis cases in a selected district of Tamil Nadu. Indian Journal of Tuberculosis. 2022 Oct;69(4):641–6. | Exclude | Different outcomes |
| 3 | Liu X, et al. Usability of a Medication Event Reminder Monitor System (MERM) by Providers and Patients to Improve Adherence in the Management of Tuberculosis. IJERPH. 2017 Sept;14(10):1115. | Exclude | Different outcomes |
| 4 | Gross R, et al. Two-way mobile phone intervention compared with standard-of-care adherence support after second-line antiretroviral therapy failure: a multinational, randomised controlled trial. The Lancet Digital Health. 2019 May;1(1):e26–34. | Exclude | Different comparator |
| 5 | Kunawararak P, et al. Tuberculosis treatment with mobile-phone medication reminders in northern Thailand. Southeast Asian J Trop Med Public Health. 2011 Nov;42(6):1444–51. | Exclude | Different study design |
| 6 | Kumwichar P, et al. Tuberculosis Treatment Compliance Under Smartphone-Based Video-Observed Therapy Versus Community-Based Directly Observed Therapy: Cluster Randomized Controlled Trial. JMIR Mhealth Uhealth. 2024;12:e53411. | Include |  |
| 7 | Saha S, et al. Tuberculosis Monitoring Encouragement Adherence Drive (TMEAD): Toward improving the adherence of the patients with drug-sensitive tuberculosis in Nashik, Maharashtra. Front Public Health. 2022 Dec;10:1021427. | Exclude | Different study design |
| 8 | Cassels A, et al. Tuberculosis case-finding in Eastern Nepal. Tubercle. 1982 Sept;63(3):175–85. | Exclude | Different study design |
| 9 | Al-Sahafi A, et al. Treatment outcomes among tuberculosis patients in Jeddah, Saudi Arabia: Results of a community mobile outreach directly observed Treatment, Short-course (DOTS) project. Journal of Clinical Tuberculosis and Other Mycobacterial Diseases. 2021 Feb;22:100210. | Exclude | Different patient population |
| 10 | Laksono EB, et al. The utilization of mobile-health intervention in improving treatment compliance behavior in tuberculosis patients. nhjk. 2022 Dec;11(2):275–86. | Exclude | Different study design |
| 11 | Farooqi RJ, et al. The role of mobile SMS-reminders in improving drugs compliance in patients receiving anti-TB treatment from DOTS program. Journal of Postgraduate Medical Institute. 2017;31(2). | Include |  |
| 12 | Guo P, et al. Telemedicine Technologies and Tuberculosis Management: A Randomized Controlled Trial. Telemed J E Health. 2020;26(9):1150–6. | Include |  |
| 13 | Garfein RS, Doshi RP. Synchronous and asynchronous video observed therapy (VOT) for tuberculosis treatment adherence monitoring and support. Journal of Clinical Tuberculosis and Other Mycobacterial Diseases. 2019 Dec;17:100098. | Exclude | Different study design |
| 14 | Shrestha P, et al. Strengthening primary health care through community health workers in South Asia. The Lancet Regional Health - Southeast Asia. 2024 Sept;28:100463. | Exclude | Different intervention |
| 15 | Wagstaff A, et al. SMS nudges as a tool to reduce tuberculosis treatment delay and pretreatment loss to follow-up. A randomized controlled trial. PLoS One. 2019;14(6):e0218527. | Exclude | Different outcomes |
| 16 | Kumboyono. Short message service as an alternative in the drug consumption evaluation of persons with tuberculosis in Malang, Indonesia. Japan Journal Nursing Sci. 2017 Apr;14(2):112–6. | Exclude | Different study design |
| 17 | Subbaraman R, et al. Randomized trial findings suggest an uncertain trail ahead for TB digital adherence technologies. int j tuberc lung dis. 2022 Apr;26(4):378–9. | Exclude | Different study design |
| 18 | Manyazewal T, et al. Patient-reported usability and satisfaction with electronic medication event reminder and monitor device for tuberculosis: a multicentre, randomised controlled trial. eClinicalMedicine. 2023 Feb;56:101820. | Exclude | Different outcomes |
| 19 | Berger C, et al. Opportunities to improve digital adherence technologies and TB care using human-centered design. int j tuberc lung dis. 2020 Oct;24(10):1112–5. | Exclude | Different study design |
| 20 | Mgode G, et al. Monitoring Tuberculosis (TB) Treatment Adherence Using eCompliance Digital Tool by Community Healthcare Workers. In 2021. p. 231–41. | Exclude | Different study design |
| 21 | Setiyowati E, et al. Monitoring medication adherence using smart digital technology in patients with pulmonary tuberculosis. Healthc Low-resour S. 2024 June. | Exclude | Different study design |
| 22 | Burzynski J, et al. In-Person vs Electronic Directly Observed Therapy for Tuberculosis Treatment Adherence: A Randomized Noninferiority Trial. JAMA Netw Open. 2022 Jan;5(1):e2144210. | Exclude | Different patient population |
| 23 | Mohammed S, et al. Impact of a Daily SMS Medication Reminder System on Tuberculosis Treatment Outcomes: A Randomized Controlled Trial. PLoS One. 2016;11(11):e0162944. | Include |  |
| 24 | AlSahafi AJ, et al. High non-compliance rate with anti-tuberculosis treatment: a need to shift facility-based directly observed therapy short course (DOTS) to community mobile outreach team supervision in Saudi Arabia. BMC Public Health. 2019 Dec;19(1):1168. | Exclude | Different comparator |
| 25 | Abas SA, et al. Enhancing tuberculosis treatment adherence and motivation through gamified real-time mobile app utilization: a single-arm intervention study. BMC Public Health. 2024 Jan;24(1):249. | Exclude | Different study design |
| 26 | Bao Y, et al. Effects of an mHealth Intervention for Pulmonary Tuberculosis Self-management Based on the Integrated Theory of Health Behavior Change: Randomized Controlled Trial. JMIR Public Health Surveill. 2022 July;8(7):e34277. | Exclude | Different outcomes |
| 27 | Liu X, et al. Effectiveness of Electronic Reminders to Improve Medication Adherence in Tuberculosis Patients: A Cluster-Randomised Trial. PLoS Med. 2015;12(9):e1001876. | Include |  |
| 28 | Manyazewal T, et al. Effectiveness of a digital medication event reminder and monitor device for patients with tuberculosis (SELFTB): a multicenter randomized controlled trial. BMC Med. 2022 Sept;20(1):310. | Exclude | Different patient population |
| 29 | Wei X, et al. Effectiveness of a comprehensive package based on electronic medication monitors at improving treatment outcomes among tuberculosis patients in Tibet: a multicentre randomised controlled trial. Lancet. 2024;403(10430):913–23. | Include |  |
| 30 | Fang XH, et al. Effect of Short Message Service on Management of Pulmonary Tuberculosis Patients in Anhui Province, China: A Prospective, Randomized, Controlled Study. Med Sci Monit. 2017;23:2465–9. | Include |  |
| 31 | Majella M, et al. Effect of mobile voice calls on treatment initiation among patients diagnosed with tuberculosis in a tertiary care hospital of Puducherry: A randomized controlled trial. Journal of Postgraduate Medicine. 2021 Oct;67(4):205–12. | Exclude | Different outcomes |
| 32 | Jerene D, et al. Effect of digital adherence technologies on treatment outcomes in people with drug-susceptible tuberculosis: four pragmatic, cluster-randomised trials. Lancet. 2025;405(10485):1155–66. | Include |  |
| 33 | Gupta A, et al. Effect of "mHealth" Interventions on adherence to treatment and outcomes in Tuberculosis patients of district Shimla, Himachal Pradesh, India: A Randomised Control Trial. 2020. | Include |  |
| 34 | Zaidi HA, Wells CD. Digital health technologies and adherence to tuberculosis treatment. Bull World Health Organ. 2021 May;99(5):323–323. | Exclude | Different study design |
| 35 | Oeser C, et al. Digital approaches to reducing TB treatment loss to follow-up. int j tuberc lung dis. 2023 June;27(6):432–7. | Exclude | Different study design |
| 36 | Liu X, et al. Digital adherence technologies to improve tuberculosis treatment outcomes in China: a cluster-randomised superiority trial. Lancet Glob Health. 2023;11(5):e693–703. | Include |  |
| 37 | Khatun F, et al. Determinants of readiness to adopt mHealth in a rural community of Bangladesh. International Journal of Medical Informatics. 2015 Oct;84(10):847–56. | Exclude | Different outcomes |
| 38 | Delivering Community-based Interventions and Disease Management Tools Across a Digital Platform in Order to Increase TB Treatment Adherence in LMICs. | Exclude | Different patient population |
| 39 | Hunchangsith P, et al. Cost-Effectiveness of Various Tuberculosis Control Strategies in Thailand. Value in Health. 2012 Jan;15(1):S50–5. | Exclude | Different patient population |
| 40 | Rosu L, et al. Cost of digital technologies and family-observed DOT for a shorter MDR-TB regimen: a modelling study in Ethiopia, India and Uganda. BMC Health Serv Res. 2023 Nov;23(1):1275. | Exclude | Different outcomes |
| 41 | Massachusetts Institute of Technology. Behavior Change and Digital Health Interventions for Improved TB Treatment Outcomes: a RCT. clinicaltrials.gov; 2022 Jan. Report No.: NCT04119375. | Exclude | Different patient population |
| 42 | Htet KKK, et al. Active Tuberculosis Screening via a Mobile Health App in Myanmar: Incremental Cost-Effectiveness Evaluation. JMIR Form Res. 2023 Nov;7:e51998. | Exclude | Different outcomes |
| 43 | Elangovan R, Arulchelvan S. A study on the role of mobile phone communication in tuberculosis DOTS treatment. Indian J Community Med. 2013;38(4):229. | Exclude | Different study design |
| 44 | Prabhu A, et al. "99DOTS" techno-supervision for tuberculosis treatment -- A boon or a bane? Exploring challenges in its implementation at a tertiary centre in Delhi, India. Indian Journal of Tuberculosis. 2020 Jan;67(1):46–53. | Exclude | Different patient population |
