# Supplementary material for: Effective mHealth Interventions to Improve Tuberculosis Treatment Adherence in Asia: A Systematic Review and Meta-Analysis
Source: Research Square preprint supplement (doi:10.21203/rs.3.rs-8383251/v1), 2025-12-22
Supplement: Supplementary file 4 [file a843b1b9d8e0163321780884.docx]

Supplementary material 2: Search strategy -

| **Database** | **Date** | **Search String** | **Total articles** |
| --- | --- | --- | --- |
| Science Direct | 23/04/2025 | (tuberculosis) AND (mHealth OR "text message" OR "smartphone app") AND (adherence OR compliance OR "treatment completion") AND (Asian countries) | 232 |
| 23/04/2025 | telemedicine or mhealth AND tb | 97 |
| 23/04/2025 | mobile AND tb or tuberculosis AND RCT AND asia | 123 |
| PubMed | 23/04/2025 | (Telemedicine OR Text Messaging OR Mobile Applications OR mHealth OR remote monitoring) AND (Tuberculosis) AND (Medication Adherence OR treatment adherence) AND RCT | 9 |
| 30/04/2025 | telemedicine or mhealth AND tb | 299 |
| 30/04/2025 | SMS AND tuberculosis AND RCT | 5 |
| 30/04/2025 | Application AND tuberculosis AND RCT | 7 |
| 23/04/2025 | (("Tuberculosis" OR tuberculosis OR TB OR "Mycobacterium tuberculosis" OR "pulmonary tuberculosis" OR "tuberculous")  AND  ("Telemedicine" OR "Mobile Applications" OR "Cell Phone" OR "Smartphone" OR "Text Messaging" OR mHealth OR "mobile health" OR eHealth OR "digital health" OR "mobile application* OR "smartphone app* OR "mobile app* OR "text messag*" OR SMS OR "short message service" OR "video observed therapy" OR VOT OR "smart pill*" OR "electronic reminder*" OR "mobile technolog*" OR "mobile phone*" OR "cell* phone*" OR telehealth OR telemedicine OR "video conferenc*")  AND  ("Medication Adherence" OR "Patient Compliance" OR "Treatment Adherence and Compliance" OR adher*OR compliance OR compliant OR concordance OR persistence OR "treatment success" OR "treatment completion" OR "medication adherence" OR "patient compliance" OR "follow-up" OR retention)  AND  ("Asia"[Mesh] OR Asia* OR "Afghanistan" OR "Bangladesh" OR "Bhutan" OR "Cambodia" OR "China" OR "India" OR "Indonesia" OR "Japan" OR "Korea" OR "Laos" OR "Malaysia" OR "Maldives" OR "Mongolia" OR "Myanmar" OR "Nepal" OR "Pakistan" OR "Philippines" OR "Singapore" OR "Sri Lanka" OR "Taiwan" OR "Thailand" OR "Vietnam" OR "Saudi Arabia" OR "United Arab Emirates" OR "South Asia" OR "Southeast Asia" OR "East Asia" OR "Central Asia")  AND  ("Randomized Controlled Trial" OR "Controlled Clinical Trial" OR randomized OR randomised OR randomly OR trial OR "clinical trial" OR RCT)) | 223 |
| 30/04/2025 | Mobile AND tuberculosis AND RCT | 12 |
| DOAJ | 30/04/2025 | mhealth AND tb | 67 |
| 30/04/2025 | (Telemedicine OR Text Messaging OR Mobile Applications OR mHealth OR remote monitoring) AND (Tuberculosis) AND (Medication Adherence OR treatment adherence) AND RCT | 2 |
| Clinicaltrails.gov | 12/05/2025 | (tuberculosis) AND (mHealth) AND (adherence OR compliance OR treatment completion) AND (ASIA) | 1 |
| Cochrane library | 23/04/2025 | Tuberculosis AND mhealth | 39 |
| Lilacs | 25/04/2025 | mhealth AND tb or tuberculosis | 2 |
| Ovid | 30/04/2025 | (Telemedicine OR Text Messaging OR Mobile Applications OR mHealth OR remote monitoring) AND (Tuberculosis) AND (Medication Adherence OR treatment adherence) AND RCT | 5 |
| 30/04/2025 | telemedicine or mhealth AND tb | 6 |
| 30/04/2025 | mobile AND tb or tuberculosis AND RCT AND Asia | 1 |
| Google Scholar | 12/05/2025 | Medication adherence among tuberculosis patients in Asian countries RCT | 100 |
| Citation Searching | 14/04/2025 |  | 185 |
| Grey literature | 12/05/2025 |  | 12 |
| **TOTAL** |  |  | **1427** |
